# Supplementary material for: Novel Antihypertensive Peptides Derived from Adlay (Coix larchryma-jobi L. var. ma-yuen Stapf) Glutelin
Source: PubMed Central journal article supplement (PMC6155628; doi:10.3390/molecules22010123), 2017-01-13
Supplement: molecules-22-00123-s001.pdf [file molecules-22-00123-s001.pdf]

# Supplementary Materials: A Novel Antihypertensive Derived from Adlay (*Coix lachryma-jobi* L. var. *mayuen Stapf*) Glutelin

Bin Li, Liansheng Qiao, Lingling Li, Yanling Zhang, Kai Li, Lingzhi Wang and Yanjiang Qiao

The peaks of HA and HHL standard eluted out of C<sub>18</sub> column were showed in Figure S1A,B, respectively. The negative control peak of borate buffer was showed in Figure S1 and the positive control of Captopril demonstrated a significant ACE inhibitory ratio of 86.43% at a concentration of  $2 \times 10^{-8}$  mol·L<sup>-1</sup> (Figure 1D). The HA concentration of the CGH (Figure 1E) sharply decreased compared with the negative control.

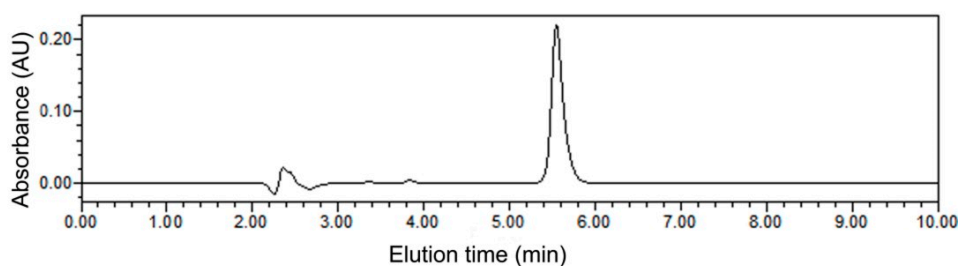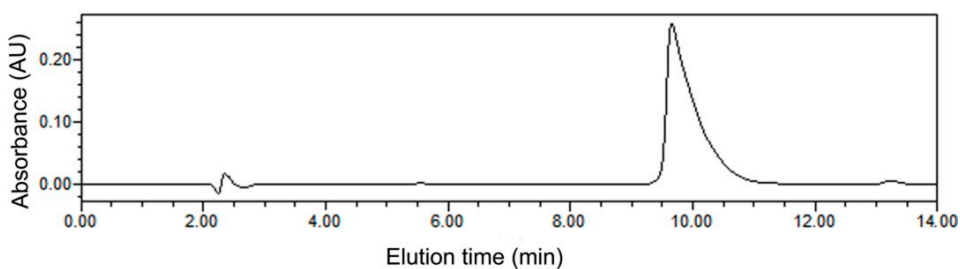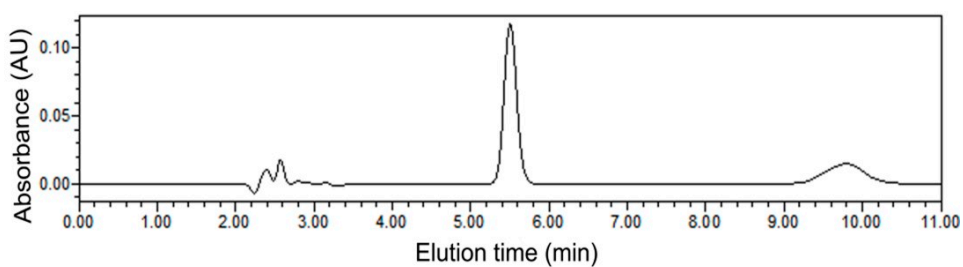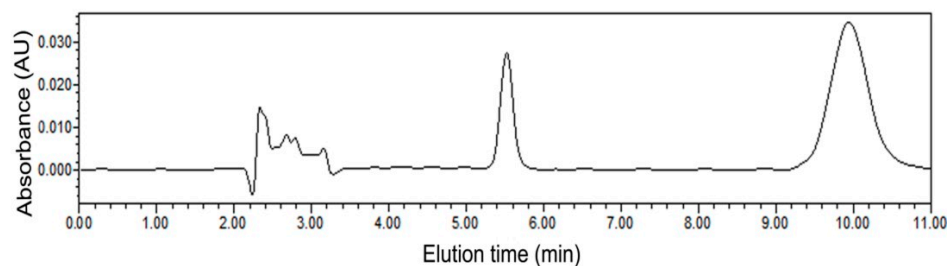

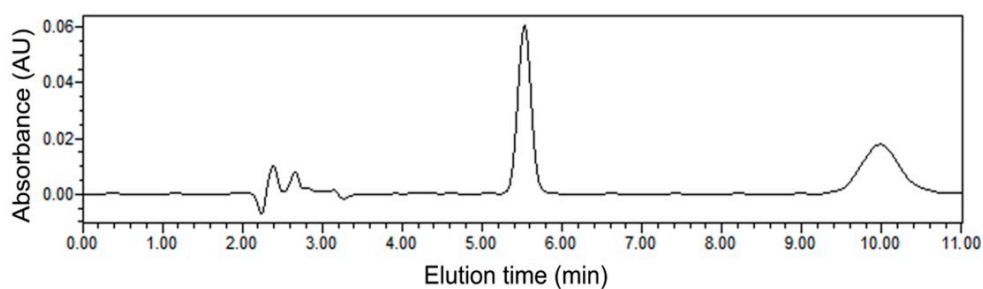

(E)

**Figure S1.** RP-HPLC chromatograms of (A) HA standard; (B) HHL standard; (C) blank control; (D) captopril of  $2 \times 10^{-8} \text{ mol}\cdot\text{L}^{-1}$ ; and (E) the CGH ( $\leq 3 \text{ kDa}$ ) obtained under 0.1 Mpa UF pressure (final concentration of  $0.02 \text{ mg}\cdot\text{L}^{-1}$ ).

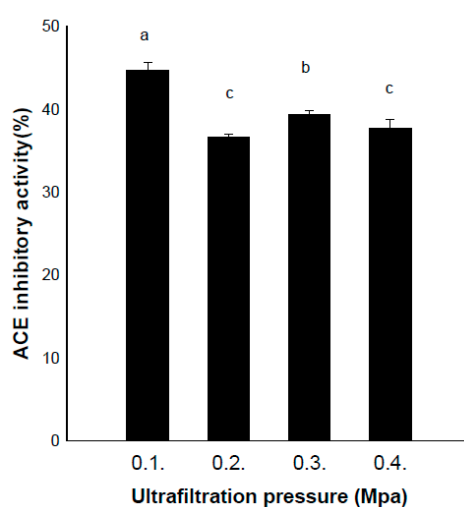

**Figure S2.** The ACE inhibitory activity of CGH ( $\leq 3 \text{ kDa}$ ) obtained under different pressure. The samples were measured at the final concentration of  $0.02 \text{ mg}\cdot\text{L}^{-1}$ . Different letters above the column indicated the percentage of ACE-inhibitory activity were significantly different ( $p < 0.05$ ).

### The ACE Inhibitory Activity of Fractions F1–F5

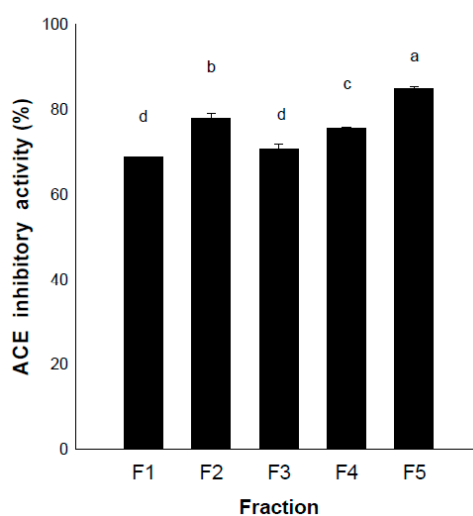

**Figure S3.** The ACE inhibitory activity of fractions separated by GFC. Different letters above the column indicated the percentage of ACE-inhibitory activity were significantly different ( $p < 0.05$ ).

## Sequence Profile of the Peptides VGQLGGAAGGAF

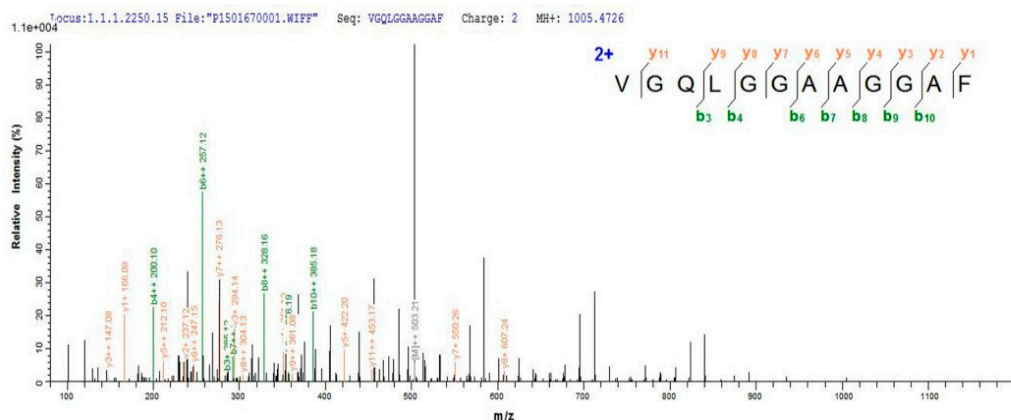

Figure S4. The ESI-MS/MS spectrum of VGQLGGAAGGAF.

## The ACE Inhibitory Activity of Fractions F5-1–F5-9

Table S1. ACE inhibition rate of sub-fractions separated by RP-HPLC.

| Fractions | ACE Inhibitory Rate (%)   |
|-----------|---------------------------|
| F5-1      | 42.14 ± 0.48 <sup>c</sup> |
| F5-2      | 50.42 ± 1.81 <sup>b</sup> |
| F5-3      | 60.06 ± 0.72 <sup>a</sup> |
| F5-4      | 3.39 ± 2.07 <sup>g</sup>  |
| F5-5      | 31.22 ± 0.71 <sup>d</sup> |
| F5-6      | 30.18 ± 2.01 <sup>d</sup> |
| F5-7      | 14.91 ± 2.73 <sup>e</sup> |
| F5-8      | 41.10 ± 1.26 <sup>c</sup> |
| F5-9      | 9.61 ± 3.21 <sup>f</sup>  |

The final sample concentration was 0.01 mg·mL<sup>-1</sup>. The data were expressed as mean ± standard deviation ( $n = 3$ ). Different letters (the superscript words a–g) indicated above the percentage of ACE inhibitory activity were significantly different ( $p < 0.05$ ).
